# Supplementary material for: Manipulation of electrical characteristics of non-volatile transistor-type memory devices through the acceptor strength of donor–acceptor conjugated copolymers
Source: Royal Society of Chemistry journal article supplement (doi:10.1039/c6tc01765g), 2016-01-01
Supplement: c6tc01765g1.pdf [file c6tc01765g1.pdf]

## **Supporting Information**

**For**

### **Manipulation on the Electrical Characteristics of Nonvolatile Transistor-Type Memory Devices through the Acceptor Strength of Donor-Acceptor Conjugated Copolymers**

Chien Lu,<sup>a</sup> Wen-Ya Lee<sup>b\*</sup> and Wen-Chang Chen<sup>a\*</sup>

<sup>a.</sup> Department of Chemical Engineering, National Taiwan University, Taipei 10617, Taiwan, R.O.C. E-mail: chenwc@ntu.edu.tw

<sup>b.</sup> Department of Chemical Engineering and Biotechnology, National Taipei University of Technology, Taipei 106, Taiwan, ROC. E-mail: wenyalee@mail.ntut.edu.tw

### Polymerization of PDTT-DPP.

The similar structure of PDTT-DPP with different alkyl chain length were developed by McCulloch group for photovoltaic devices.<sup>38</sup> Amounts of 261mg of 2,6-bis(tri-n-butylstannyl)dithieno[3,2-b:2',3'-d]thiophene (0.50 mmol), 452 mg of 3,6-bis(5-bromothiophen-2-yl)-2,5-bis(2-hexyldecyl)pyrrolo[3,4-c]pyrrole-1,4(2H,5H)-dione (0.50 mmol), tri(o-tolyl)phosphine (16 mol% with respect to the monomer), and tris(dibenzylideneacetone)dipalladium(0) (2 mol % with respect to ditin monomer) were dissolved in 15ml of chlorobenzene. Then, the copolymer was synthesized by Pd(0)-catalyzed Stille coupling polymerization under microwave heating. After end-capped with trimethyl(thiophen-2-yl)stannane and bromothiophene (both 1.1 equiv. with respect to the monomers), the mixture was cooled and poured into methanol to afford a dark green solid (yield, 65%). <sup>1</sup>HNMR (CDCl<sub>3</sub>),  $\delta$  (ppm): 9.25-8.73 (br, Ar-H), 7.71-6.69 (m, br, Ar-H), 4.35- 3.62 (br,N-CH<sub>2</sub>), 2.12-1.86 (m, br, -CH), 1.49-0.97 (m, br,-CH<sub>2</sub>), 0.98-0.62 (m, br,-CH<sub>3</sub>). Anal. Calcd for [C<sub>56</sub>H<sub>78</sub>N<sub>2</sub>O<sub>2</sub>S<sub>5</sub>]: C, 69.23; H, 8.09; N, 2.88; O, 3.29; S, 16.50. Found: C, 67.02; H, 7.65; N, 2.48; O, 3.97; S, 18.88. Weight average molecular weight (Mw) and polydispersity index (PDI) estimated from GPC are 27550 g/mol and 1.62, respectively. The crude polymer was purified by methanol, acetone and hexane successively using a Soxhlet extraction to remove byproducts, oligomers and catalyst residues.

**Table S1** Optical and electrochemical properties of the studied conjugated polymers.

| polymer         | UV-visible                                   | Absorption                                   |                            | cyclic voltammetry |                |                           |
|-----------------|----------------------------------------------|----------------------------------------------|----------------------------|--------------------|----------------|---------------------------|
|                 | $\lambda_{\max}$ (sol.) <sup>a</sup><br>(nm) | $\lambda_{\max}$ (film) <sup>a</sup><br>(nm) | $E_g^{\text{opt}}$<br>(eV) | HOMO<br>(V/eV)     | LUMO<br>(V/eV) | $E_g^{\text{ec}}$<br>(eV) |
| <b>P4T-DTT</b>  | 500                                          | 536                                          | 1.69                       | -5.14              | -3.10          | 2.04                      |
| <b>P4T-Q</b>    | 528                                          | 546                                          | 1.83                       | -5.28              | -3.22          | 2.06                      |
| <b>P4T-BT</b>   | 566                                          | 606                                          | 1.60                       | -5.04              | -3.38          | 1.66                      |
| <b>P4T-DPP</b>  | 698                                          | 753                                          | 1.29                       | -5.17              | -3.62          | 1.55                      |
| <b>PDTT-DPP</b> | 702                                          | 705                                          | 1.36                       | -5.12              | -3.56          | 1.56                      |

<sup>a</sup> DCB as processing solution.

**Table S2** FET characteristics of the studied conjugated polymers.

| Polymer         |   | p-type mobility <sup>avg</sup><br>(cm <sup>2</sup> V <sup>-1</sup> s <sup>-1</sup> ) | on/off <sup>avg</sup> | V <sub>t</sub> <sup>avg</sup><br>(V) |
|-----------------|---|--------------------------------------------------------------------------------------|-----------------------|--------------------------------------|
| <b>P4T-DTT</b>  | P | (1.19±0.32)×10 <sup>-1</sup>                                                         | 1.52×10 <sup>5</sup>  | -3                                   |
|                 | N | -                                                                                    | -                     | -                                    |
| <b>P4T-Q</b>    | P | (3.05±0.24)×10 <sup>-4</sup>                                                         | 3.08×10 <sup>3</sup>  | -12                                  |
|                 | N | -                                                                                    | -                     | -                                    |
| <b>P4T-BT</b>   | P | (2.70±0.73)×10 <sup>-2</sup>                                                         | 2.55×10 <sup>3</sup>  | 15                                   |
|                 | N | (3.22±0.43)×10 <sup>-4</sup>                                                         | 2.14×10 <sup>2</sup>  | 84                                   |
| <b>P4T-DPP</b>  | P | (1.01±0.56)×10 <sup>-1</sup>                                                         | 1.63×10 <sup>4</sup>  | -7                                   |
|                 | N | (1.07±0.76)×10 <sup>-3</sup>                                                         | 1.33×10 <sup>3</sup>  | 56                                   |
| <b>PDTT-DPP</b> | P | (1.44±0.34)×10 <sup>-1</sup>                                                         | 1.66×10 <sup>3</sup>  | -12                                  |
|                 | N | (6.69±1.14)×10 <sup>-3</sup>                                                         | 2.07×10 <sup>3</sup>  | 63                                   |

**Table S3.** The relationship between film thickness and memory window of P4T-BT, P4T-DPP and PDTT-DPP.

|                 | Thickness<br>(nm) | Positive V <sub>t</sub><br>(V) | Negative V <sub>t</sub><br>(V) | Memory<br>window<br>(V) | Memory<br>Window <sup>avg</sup><br>(V) |
|-----------------|-------------------|--------------------------------|--------------------------------|-------------------------|----------------------------------------|
| <b>P4T-BT</b>   | 181               | 29.33                          | -21.04                         | 50.37                   |                                        |
|                 | 122               | 31.66                          | -24.72                         | 56.38                   | 54.05                                  |
|                 | 67                | 30.78                          | -24.64                         | 55.42                   |                                        |
| <b>P4T-DPP</b>  | 173               | 37.78                          | -29.56                         | 67.34                   |                                        |
|                 | 117               | 48.66                          | -29.31                         | 77.97                   | 74.81                                  |
|                 | 50                | 47.85                          | -31.27                         | 79.12                   |                                        |
| <b>PDTT-DPP</b> | 166               | 37.89                          | -13.21                         | 51.1                    |                                        |
|                 | 115               | 42.83                          | -12.33                         | 55.16                   | 53.63                                  |
|                 | 56                | 42.42                          | -12.21                         | 54.63                   |                                        |

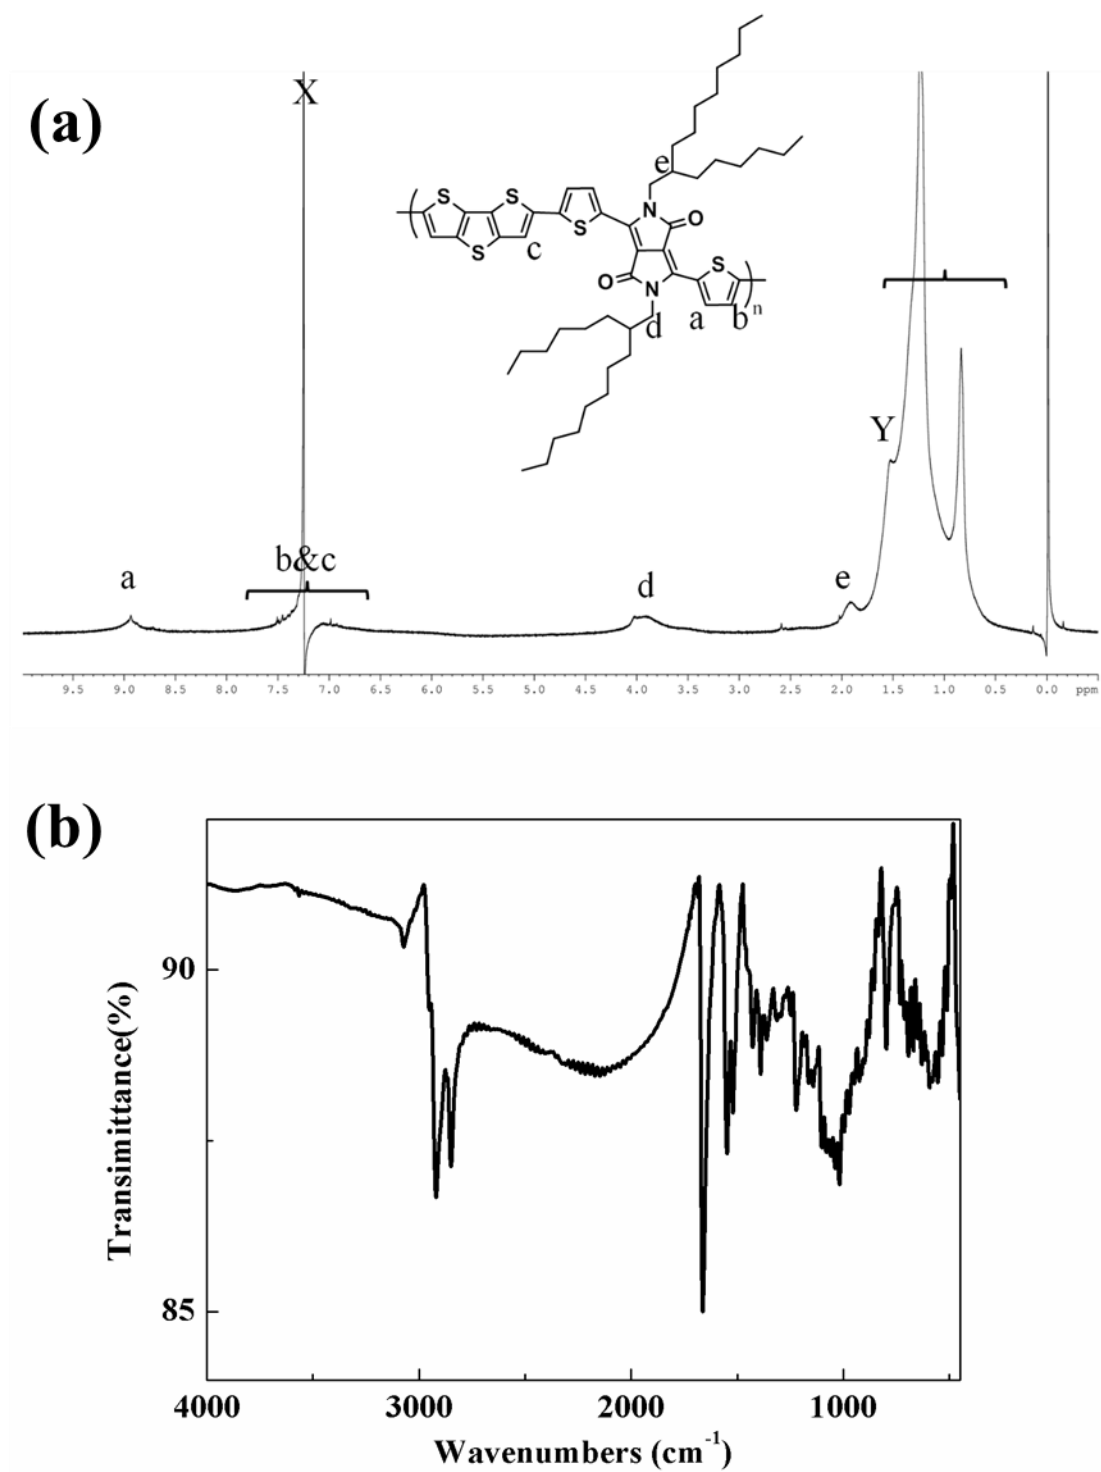

**Fig. S1** (a)  $^1\text{H}$  NMR spectrum of PDTT-DPP in  $\text{CDCl}_3$  ( $\text{X}=\text{CDCl}_3$ ,  $\text{Y}=\text{H}_2\text{O}$ ) and (b) FTIR spectrum of PDTT-DPP powder.

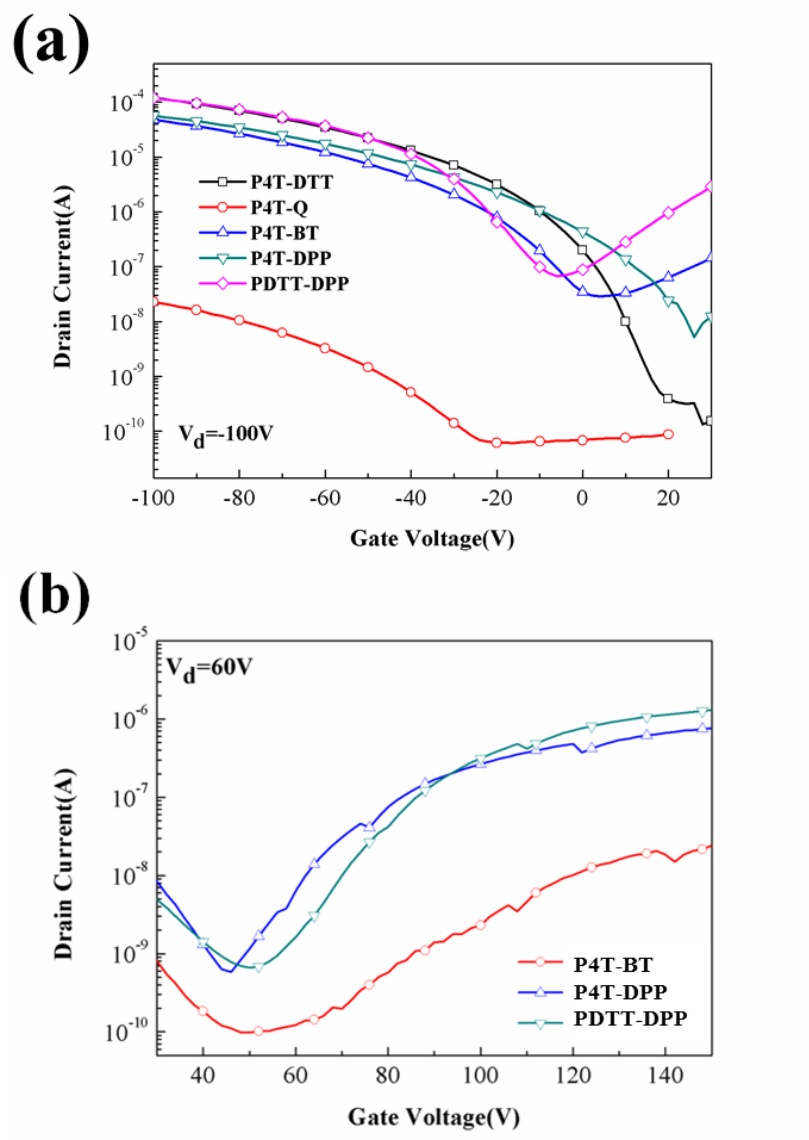

**Fig. S2** The FET transfer characteristics of the polymers: (a) p-type and (b) n-type performance.

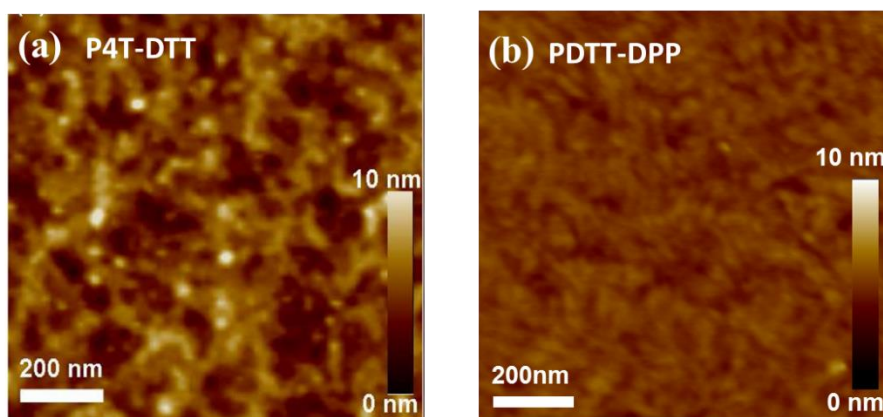

**Fig. S3.** AFM height images of (a) P4T-DTT and (b) PDTT-DPP films.

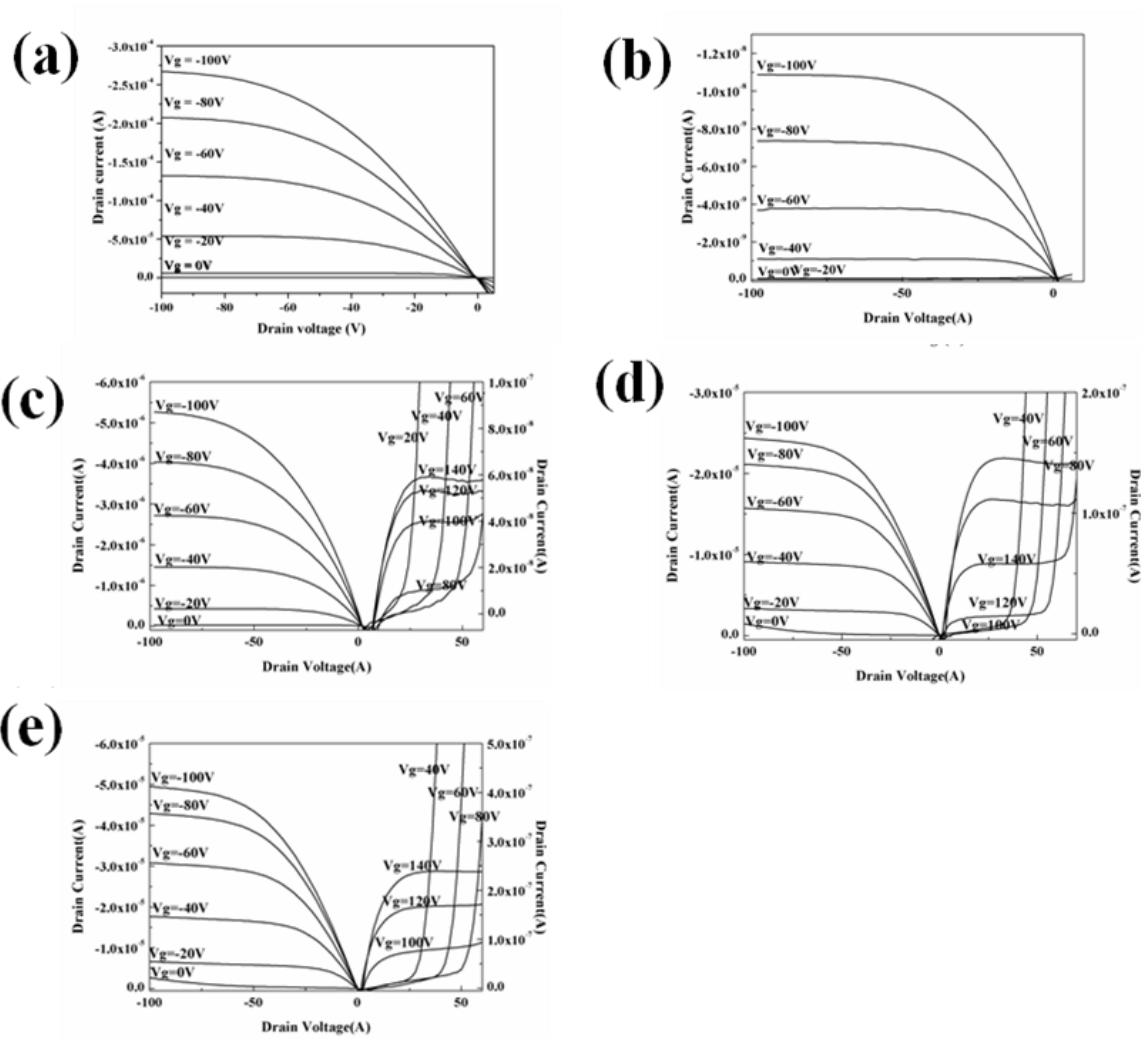

**Fig. S4** The FET output characteristics of (a) P4T-DTT, (b) P4T-Q, (c) P4T-BT, (d) P4T-DPP, and (e) PDDT-DPP.

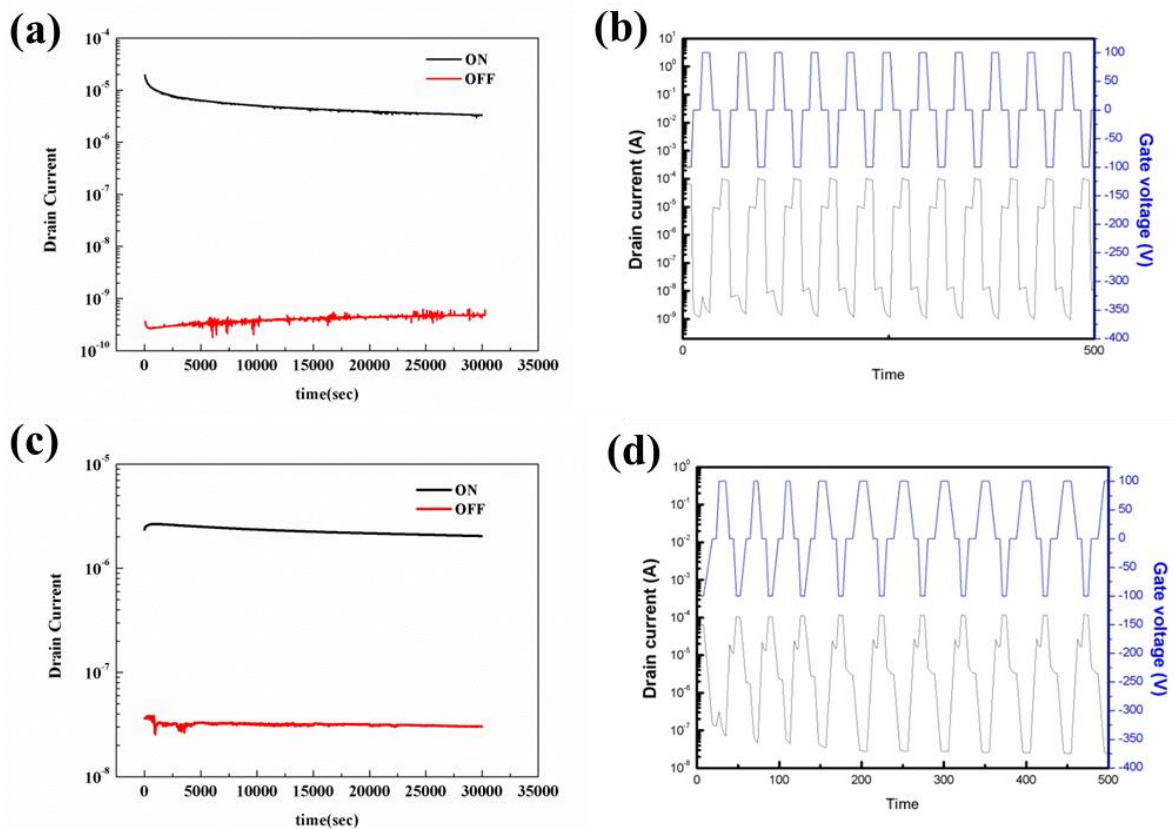

**Fig. S5** Retention time and WRER curves of the conjugated polymer-based OFET memory devices with (a, b) PDDT-DPP and (c, d) P4T-BT as active layers. The retention time of the devices were operated at a read voltage of 10 V longer than 30000s. The drain current of WRER cycles was measured at  $V_d = -100$ V and The writing, reading and erasing are set to the gate voltage of 100, 0 and -100 V, respectively, up to 200 cycles.

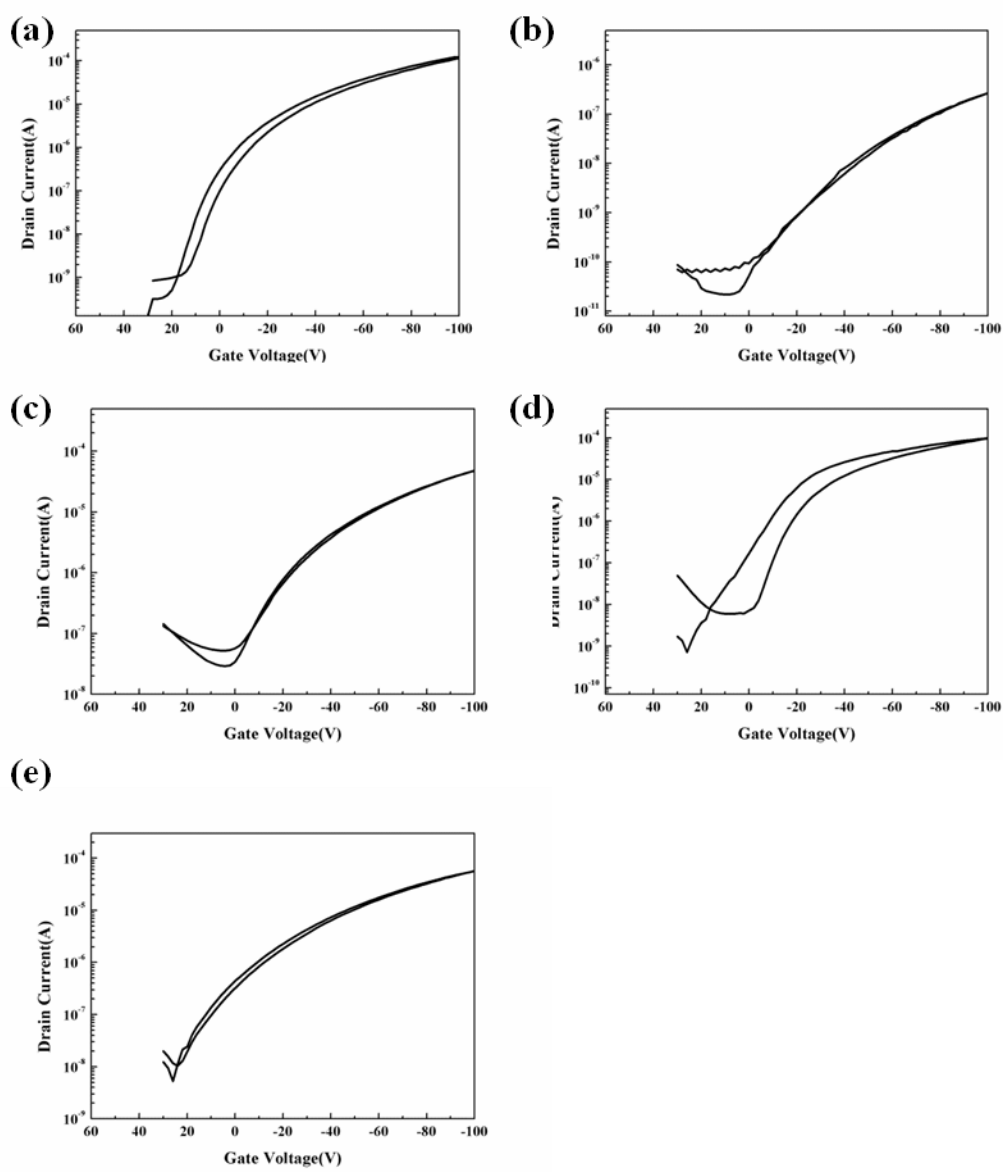

**Fig. S6** The initial dual sweep of (a) P4T-DTT, (b) P4T-Q, (c) P4T-BT, (d) P4T-DPP, and (e) PDTT-DPP.



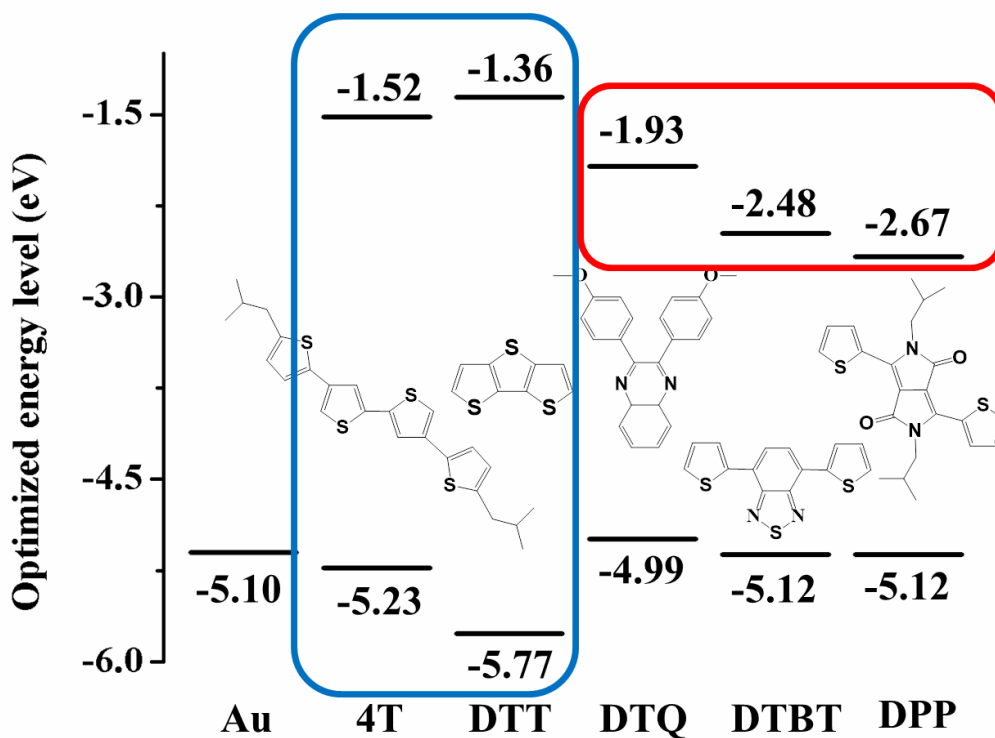

**Fig. S7** DFT molecular simulation results (B3LYP/6-31G(d) level): LUMO and HOME energy levels for the basic unit of donor and acceptor moieties with the work function of Au electrodes.

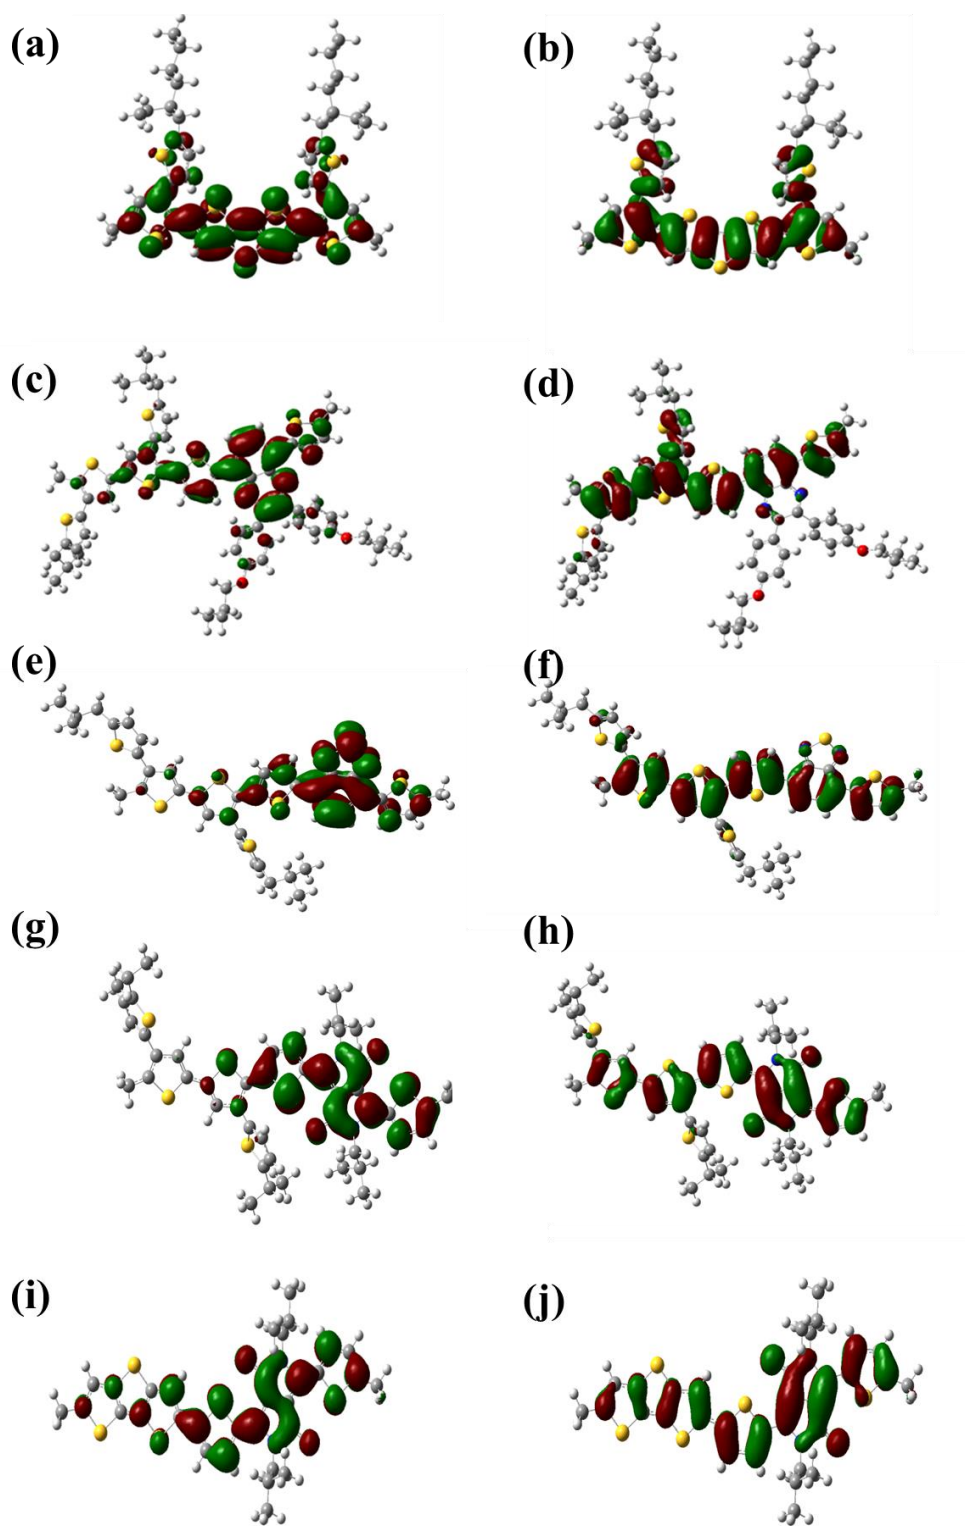

**Fig. S8** Molecular orbitals of the LUMO levels of (a) P4T-DTT, (c) P4T-Q, (e)P4T-BT (g)P4T-DPP, (i) PDTT-DPP ,and HOMO levels of (b) P4T-DTT, (d) P4T-Q, (f)P4T-BT (h)P4T-DPP, (j) PDTT-DPP.
